# Supplementary material for: Second opinion opportunity declined: patient typology and experiences regarding the decision-making process preceding elective surgeries in Germany
Source: Springer Nature journal article supplement (doi:10.1186/s12913-022-08742-4), 2022-11-08
Supplement: MOESM2 [file 23689320]

## Supplementary Material 2

Table 1. Interview guide

| Guiding Questions                                                                                                                                                                                                                                                                                                                                                                                                                                                                                                                                        | Checkaspects                                                                           |
|----------------------------------------------------------------------------------------------------------------------------------------------------------------------------------------------------------------------------------------------------------------------------------------------------------------------------------------------------------------------------------------------------------------------------------------------------------------------------------------------------------------------------------------------------------|----------------------------------------------------------------------------------------|
| <p>How did you experience the treatment from diagnosis to surgery?</p> <p>What did you feel during this time?</p> <p>What feelings accompanied you?</p> <p>How well were you informed about the consequences of the surgery?</p> <p>How well were you informed about possible alternative treatment options / strategies (incl. Watchful Waiting) and their advantages and disadvantages?</p> <p>How easy or difficult was it for you to assess the advantages and disadvantages of different treatment options?</p>                                     | <p>Warm up</p> <p>Experiencing the process of treatment</p> <p>Process description</p> |
| <p>Did you consider getting a second opinion?</p> <p>Did you get a second opinion?</p> <p>If yes:<br/>How did you experience the process? Or how did you go about getting a second opinion?</p> <p>How did you go about choosing a second opinion?</p> <p>What was your motivation for seeking a second opinion?</p> <p>Did the first and second opinions concur?</p> <p>Did the second opinion help you in reaching your decision?</p> <p>Would you want to obtain a second opinion again?</p> <p>If no:<br/>Why did you not seek a second opinion?</p> | <p>Obtaining a second opinion</p>                                                      |
| <p>Can you please describe how you made the decision to have /undergo surgery?</p>                                                                                                                                                                                                                                                                                                                                                                                                                                                                       | <p>Decision making process/<br/>influencing factors</p>                                |

|                                                                                                                                                                                                                                                                                                         |  |
|---------------------------------------------------------------------------------------------------------------------------------------------------------------------------------------------------------------------------------------------------------------------------------------------------------|--|
| <p>Would you please tell me when you made the decision to have your surgery?</p> <p>What aspects played a role in your decision making for surgery?</p> <p>What role did information-gathering play in your decision-making for surgery?</p> <p>What role do other people play in making decisions?</p> |  |
|---------------------------------------------------------------------------------------------------------------------------------------------------------------------------------------------------------------------------------------------------------------------------------------------------------|--|
