# Supplementary material for: Second opinion opportunity declined: patient typology and experiences regarding the decision-making process preceding elective surgeries in Germany
Source: Springer Nature journal article supplement (doi:10.1186/s12913-022-08742-4), 2022-11-08
Supplement: MOESM3 [file 23689320]

## Supplementary material 3

### Consolidated criteria for reporting qualitative studies (COREQ): 32-item checklist

Developed from:

Tong A, Sainsbury P, Craig J. Consolidated criteria for reporting qualitative research (COREQ): a 32-item checklist for interviews and focus groups. *International Journal for Quality in Health Care*. 2007. Volume 19, Number 6: pp. 349 – 357

| Topic                                          | Item No. | Guide questions/description                                                                                                                              | Reported on Page #                                                                 |
|------------------------------------------------|----------|----------------------------------------------------------------------------------------------------------------------------------------------------------|------------------------------------------------------------------------------------|
| <b>Domain 1: Research team and reflexivity</b> |          |                                                                                                                                                          |                                                                                    |
| <b>Personal Characteristics</b>                |          |                                                                                                                                                          |                                                                                    |
| Interviewer/facilitator                        | 1        | Which author/s conducted the interview or focus group?                                                                                                   | Susann May (SM), Sonja Mählmann (SoM)                                              |
| Credentials                                    | 2        | What were the researcher's credentials? E.g. PhD, MD                                                                                                     | SM: Master of Public Health; SoM: Dr. phil.                                        |
| Occupation                                     | 3        | What was their occupation at the time of the study?                                                                                                      | researcher                                                                         |
| Gender                                         | 4        | Was the researcher male or female?                                                                                                                       | female                                                                             |
| Experience and training                        | 5        | What experience or training did the researcher have?                                                                                                     | The researchers are trained in the collection and analysis of qualitative data.    |
| <b>Relationship with participants</b>          |          |                                                                                                                                                          |                                                                                    |
| Relationship established                       | 6        | Was a relationship established prior to study commencement?                                                                                              | 5,6                                                                                |
| Participant knowledge of the interviewer       | 7        | What did the participants know about the researcher? e.g. personal goals, reasons for doing the research                                                 | 6                                                                                  |
| Interviewer characteristics                    | 8        | What characteristics were reported about the interviewer/facilitator? e.g. Bias, assumptions, reasons and interests in the research topic                | All researchers were independent of the subject of the study and the participants. |
| <b>Domain 2: study design</b>                  |          |                                                                                                                                                          |                                                                                    |
| <b>Theoretical framework</b>                   |          |                                                                                                                                                          |                                                                                    |
| Methodological orientation and Theory          | 9        | What methodological orientation was stated to underpin the study? e.g. grounded theory, discourse analysis, ethnography, phenomenology, content analysis | 6                                                                                  |
| <b>Participant selection</b>                   |          |                                                                                                                                                          |                                                                                    |
| Sampling                                       | 10       | How were participants selected? e.g. purposive, convenience, consecutive, snowball                                                                       | 5                                                                                  |
| Method of approach                             | 11       | How were participants approached? e.g. face-to-face,                                                                                                     | 6                                                                                  |

|                                 |    |                                                                                                                                 |                             |
|---------------------------------|----|---------------------------------------------------------------------------------------------------------------------------------|-----------------------------|
|                                 |    | telephone, mail, email                                                                                                          |                             |
| Sample size                     | 12 | How many participants were in the study?                                                                                        | 8                           |
| Non-participation               | 13 | How many people refused to participate or dropped out? Reasons?                                                                 | 8                           |
| Setting                         |    |                                                                                                                                 |                             |
| Setting of data collection      | 14 | Where was the data collected? e.g. home, clinic, workplace                                                                      | 6                           |
| Presence of non-participants    | 15 | Was anyone else present besides the participants and researchers?                                                               | no                          |
| Description of sample           | 16 | What are the important characteristics of the sample? e.g. demographic data, date                                               | 8; Supplementary material 4 |
| Data collection                 |    |                                                                                                                                 |                             |
| Interview guide                 | 17 | Were questions, prompts, guides provided by the authors? Was it pilot tested?                                                   | 6                           |
| Repeat interviews               | 18 | Were repeat interviews carried out? If yes, how many?                                                                           | no                          |
| Audio/visual recording          | 19 | Did the research use audio or visual recording to collect the data?                                                             | 8                           |
| Field notes                     | 20 | Were field notes made during and/or after the interview or focus group?                                                         | 7                           |
| Duration                        | 21 | What was the duration of the interviews or focus group?                                                                         | 8                           |
| Data saturation                 | 22 | Was data saturation discussed?                                                                                                  | 6                           |
| Transcripts returned            | 23 | Were transcripts returned to participants for comment and/or correction?                                                        | no                          |
| Domain 3: analysis and findings |    |                                                                                                                                 |                             |
| Data analysis                   |    |                                                                                                                                 |                             |
| Number of data coders           | 24 | How many data coders coded the data?                                                                                            | 7                           |
| Description of the coding tree  | 25 | Did authors provide a description of the coding tree?                                                                           | 14                          |
| Derivation of themes            | 26 | Were themes identified in advance or derived from the data?                                                                     | 6,7                         |
| Software                        | 27 | What software, if applicable, was used to manage the data?                                                                      | 7                           |
| Participant checking            | 28 | Did participants provide feedback on the findings?                                                                              | no                          |
| Reporting                       |    |                                                                                                                                 |                             |
| Quotations presented            | 29 | Were participant quotations presented to illustrate the themes/findings? Was each quotation identified? e.g. participant number | 9-14                        |

|                              |    |                                                                        |      |
|------------------------------|----|------------------------------------------------------------------------|------|
| Data and findings consistent | 30 | Was there consistency between the data presented and the findings?     | 9-14 |
| Clarity of major themes      | 31 | Were major themes clearly presented in the findings?                   | 9-14 |
| Clarity of minor themes      | 32 | Is there a description of diverse cases or discussion of minor themes? | 9-14 |
