# Supplementary material for: Second opinion opportunity declined: patient typology and experiences regarding the decision-making process preceding elective surgeries in Germany
Source: Springer Nature journal article supplement (doi:10.1186/s12913-022-08742-4), 2022-11-08
Supplement: MOESM4 [file 23689320]

Supplementary Material 4: Detailed socio-demographic information

| ID        | Age | Sex    | Settlement pattern                 | Educational level              | Highest qualification                | Surgery | Date Surgery | Decisional Type |
|-----------|-----|--------|------------------------------------|--------------------------------|--------------------------------------|---------|--------------|-----------------|
| MaG201_HE | 32  | female | Towns and suburbs (>5.000-100.000) | 9–10 years of school completed | Apprenticeship                       | HE      | 2018         | Type 4          |
| MäG201_HE | 45  | female | Towns and suburbs (>5.000-100.000) | 9–10 years of school completed | Apprenticeship                       | HE      | 2019         | Type 1          |
| MaG202_HE | 47  | female | Cities (>100.000)                  | 9–10 years of school completed | Diplom                               | HE      | 2019         | Type 3          |
| MäG202_HE | 80  | female | Cities (>100.000)                  | 9–10 years of school completed | Apprenticeship                       | SA      | 2019         | Type 1          |
| MäG203_SA | 80  | female | Cities (>100.000)                  | 9–10 years of school completed | Apprenticeship                       | SA      | 2019         | Type 1          |
| MaG203_TE | 36  | male   | Towns and suburbs (>5.000-100.000) | > 10 years of school completed | Apprenticeship                       | TE      | 2019         | Type 3          |
| MaG204_HE | 55  | female | Towns and suburbs (>5.000-100.000) | 9–10 years of school completed | Apprenticeship                       | HE      | 2018         | Type 4          |
| MäG204_TE | 34  | male   | Cities (>100.000)                  | 9–10 years of school completed | Apprenticeship                       | TE      | 2019         | Type 4          |
| MaG205_HE | 49  | female | Cities (>100.000)                  | 9–10 years of school completed | Apprenticeship                       | HE      | 2019         | Type 3          |
| MäG205_SA | 59  | female | Rural region (<5.000)              | 9–10 years of school completed | Apprenticeship                       | SA      | 2020         | Type 1          |
| MaG206_HE | 50  | female | Rural region (<5.000)              | 9–10 years of school completed | Apprenticeship                       | HE      | 2019         | Type 1          |
| MäG206_HE | 76  | female | Cities (>100.000)                  | 9–10 years of school completed | Apprenticeship                       | HE      | 2019         | Type 2          |
| MaG207_SA | 64  | male   | Rural region (<5.000)              | 9–10 years of school completed | Apprenticeship                       | SA      | 2020         | Type 1          |
| MäG207_SA | 77  | female | Cities (>100.000)                  | 9–10 years of school completed | Apprenticeship                       | SA      | 2020         | Type 3          |
| MaG208_TE | 23  | male   | Towns and suburbs (>5.000-100.000) | 9–10 years of school completed | none                                 | TE      | 2019         | Type 3          |
| MaG209_SA | 65  | male   | Cities (>100.000)                  | 9–10 years of school completed | Apprenticeship                       | SA      | 2018         | Type 3          |
| MäG209_TE | 25  | female | Cities (>100.000)                  | > 10 years of school completed | none                                 | TE      | 2020         | Type 4          |
| MaG210_HE | 43  | female | Rural region (<5.000)              | > 10 years of school completed | Apprenticeship                       | HE      | 2019         | Type 3          |
| MäG210_HE | 44  | female | Cities (>100.000)                  | 9–10 years of school completed | Apprenticeship                       | HE      | 2019         | Type 4          |
| MaG211_TE | 66  | male   | Cities (>100.000)                  | 9–10 years of school completed | Apprenticeship                       | TE      | 2019         | Type 3          |
| MaG212_SA | 60  | female | Cities (>100.000)                  | 9–10 years of school completed | Apprenticeship                       | SA      | 2018         | Type 1          |
| MäG212_SA | 64  | male   | Cities (>100.000)                  | 9–10 years of school completed | Apprenticeship                       | SA      | 2019         | Type 1          |
| MaG213_HE | 48  | female | Towns and suburbs (>5.000-100.000) | > 10 years of school completed | Apprenticeship                       | HE      | 2019         | Type 1          |
| MäG213_HE | 51  | female | Cities (>100.000)                  | 9–10 years of school completed | Apprenticeship                       | HE      | 2019         | Type 3          |
| MaG214_SA | 53  | female | Rural region (<5.000)              | 9–10 years of school completed | Masters or Magisters degree/ Diploma | SA      | 2020         | Type 4          |
| MäG214_SA | 35  | male   | Cities (>100.000)                  | > 10 years of school completed | Apprenticeship                       | SA      | 2020         | Type 4          |
| MaG215_TE | 24  | female | Cities (>100.000)                  | > 10 years of school completed | Masters or Magisters degree/ Diploma | TE      | 2018         | Type 3          |
| MaG216_HE | 49  | female | Cities (>100.000)                  | 9–10 years of school completed | Apprenticeship                       | HE      | 2019         | Type 3          |
| MaG217_HE | 59  | female | Towns and suburbs (>5.000-100.000) | 9–10 years of school completed | Apprenticeship                       | HE      | 2019         | Type 3          |
| MäG218_HE | 69  | female | Cities (>100.000)                  | 9–10 years of school completed | Apprenticeship                       | HE      | 2020         | Type 1          |
| MaG218_SA | 61  | male   | Cities (>100.000)                  | 9–10 years of school completed | Apprenticeship                       | SA      | 2019         | Type 1          |
| MaG219_SA | 69  | male   | Towns and suburbs (>5.000-100.000) | 9–10 years of school completed | Apprenticeship                       | SA      | 2020         | Type 1          |
| MaG220_SA | 61  | female | Towns and suburbs (>5.000-100.000) | > 10 years of school completed | Masters or Magisters degree/ Diploma | SA      | 2019         | Type 3          |
| MäG220_SA | 69  | female | Rural region (<5.000)              | 9–10 years of school completed | Apprenticeship                       | SA      | 2020         | Type 1          |
| MaG221_HE | 40  | female | Cities (>100.000)                  | 9–10 years of school completed | Apprenticeship                       | HE      | 2018         | Type 4          |
| MäG221_HE | 43  | female | Towns and suburbs (>5.000-100.000) | 9–10 years of school completed | Apprenticeship                       | HE      | 2020         | Type 3          |
| MaG222_HE | 85  | female | Rural region (<5.000)              | 9–10 years of school completed | Apprenticeship                       | HE      | 2019         | Type 2          |
| MäG222_HE | 46  | female | Towns and suburbs (>5.000-100.000) | 9–10 years of school completed | Apprenticeship                       | HE      | 2020         | Type 4          |
| MaG223_TE | 55  | male   | Towns and suburbs (>5.000-100.000) | > 10 years of school completed | Apprenticeship                       | TE      | 2018         | Type 4          |
| MaG224_TE | 35  | female | Cities (>100.000)                  | 9–10 years of school completed | Apprenticeship                       | TE      | 2018         | Type 4          |
| MaG225_SA | 57  | male   | Cities (>100.000)                  | 9–10 years of school completed | Bachelor                             | SA      | 2020         | Type 4          |
| MaG226_SA | 57  | male   | Towns and suburbs (>5.000-100.000) | 9–10 years of school completed | Apprenticeship                       | SA      | 2019         | Type 1          |
| MaG227_SA | 42  | male   | Cities (>100.000)                  | 9–10 years of school completed | none                                 | SA      | 2019         | Type 1          |

|           |    |        |                                    |                                |                                      |    |      |        |
|-----------|----|--------|------------------------------------|--------------------------------|--------------------------------------|----|------|--------|
| MaG228_HE | 44 | female | Cities (>100.000)                  | 9–10 years of school completed | Bachelor                             | HE | 2018 | Type 2 |
| MaG229_TE | 29 | male   | Cities (>100.000)                  | > 10 years of school completed | Masters or Magisters degree/ Diploma | TE | 2018 | Type 3 |
| MaG231_TE | 42 | female | Cities (>100.000)                  | 9–10 years of school completed | Apprenticeship                       | TE | 2018 | Type 1 |
| MaG232_SA | 64 | male   | Cities (>100.000)                  | 9–10 years of school completed | Apprenticeship                       | SA | 2019 | Type 3 |
| MaG233_HE | 54 | female | Cities (>100.000)                  | > 10 years of school completed | Masters or Magisters degree/ Diploma | HE | 2019 | Type 4 |
| MaG234_HE | 68 | female | Cities (>100.000)                  | 9–10 years of school completed | Apprenticeship                       | HE | 2018 | Type 2 |
| MaG235_SA | 57 | male   | Towns and suburbs (>5.000-100.000) | No formal schooling            | none                                 | SA | 2018 | Type 3 |
| MaG236_TE | 28 | female | Cities (>100.000)                  | 9–10 years of school completed | Apprenticeship                       | TE | 2018 | Type 3 |
| MaG237_TE | 33 | female | Cities (>100.000)                  | 9–10 years of school completed | Apprenticeship                       | TE | 2018 | Type 1 |
| MaG238_SA | 55 | female | Cities (>100.000)                  | 9–10 years of school completed | Apprenticeship                       | SA | 2018 | Type 1 |
| MaG239_TE | 20 | male   | Towns and suburbs (>5.000-100.000) | No formal schooling            | none                                 | TE | 2018 | Type 3 |
| MaG240_TE | 23 | female | Cities (>100.000)                  | > 10 years of school completed | Apprenticeship                       | TE | 2018 | Type 3 |
| MaG241_HE | 46 | female | Cities (>100.000)                  | > 10 years of school completed | Apprenticeship                       | HE | 2018 | Type 1 |
| MaG242_TE | 50 | female | Towns and suburbs (>5.000-100.000) | 9–10 years of school completed | Apprenticeship                       | TE | 2018 | Type 3 |
| MaG243_SA | 67 | female | Towns and suburbs (>5.000-100.000) | 9–10 years of school completed | Apprenticeship                       | SA | 2018 | Type 1 |
| MaG244_HE | 36 | female | Rural region (<5.000)              | > 10 years of school completed | Apprenticeship                       | HE | 2018 | Type 1 |
| MaG245_TE | 38 | male   | Cities (>100.000)                  | > 10 years of school completed | Masters or Magisters degree/ Diploma | TE | 2018 | Type 3 |
| MaG246_TE | 36 | female | Cities (>100.000)                  | 9–10 years of school completed | Apprenticeship                       | TE | 2017 | Type 4 |
| MaG247_TE | 26 | female | Cities (>100.000)                  | > 10 years of school completed | Apprenticeship                       | TE | 2018 | Type 4 |
